# Supplementary material for: Chlorhexidine bathing and health care-associated infections among adult intensive care patients: a systematic review and meta-analysis
Source: Springer Nature journal article supplement (doi:10.1186/s13054-016-1553-5), 2016-11-21
Supplement: MOESM2 [file 11091792]

(a) BSI

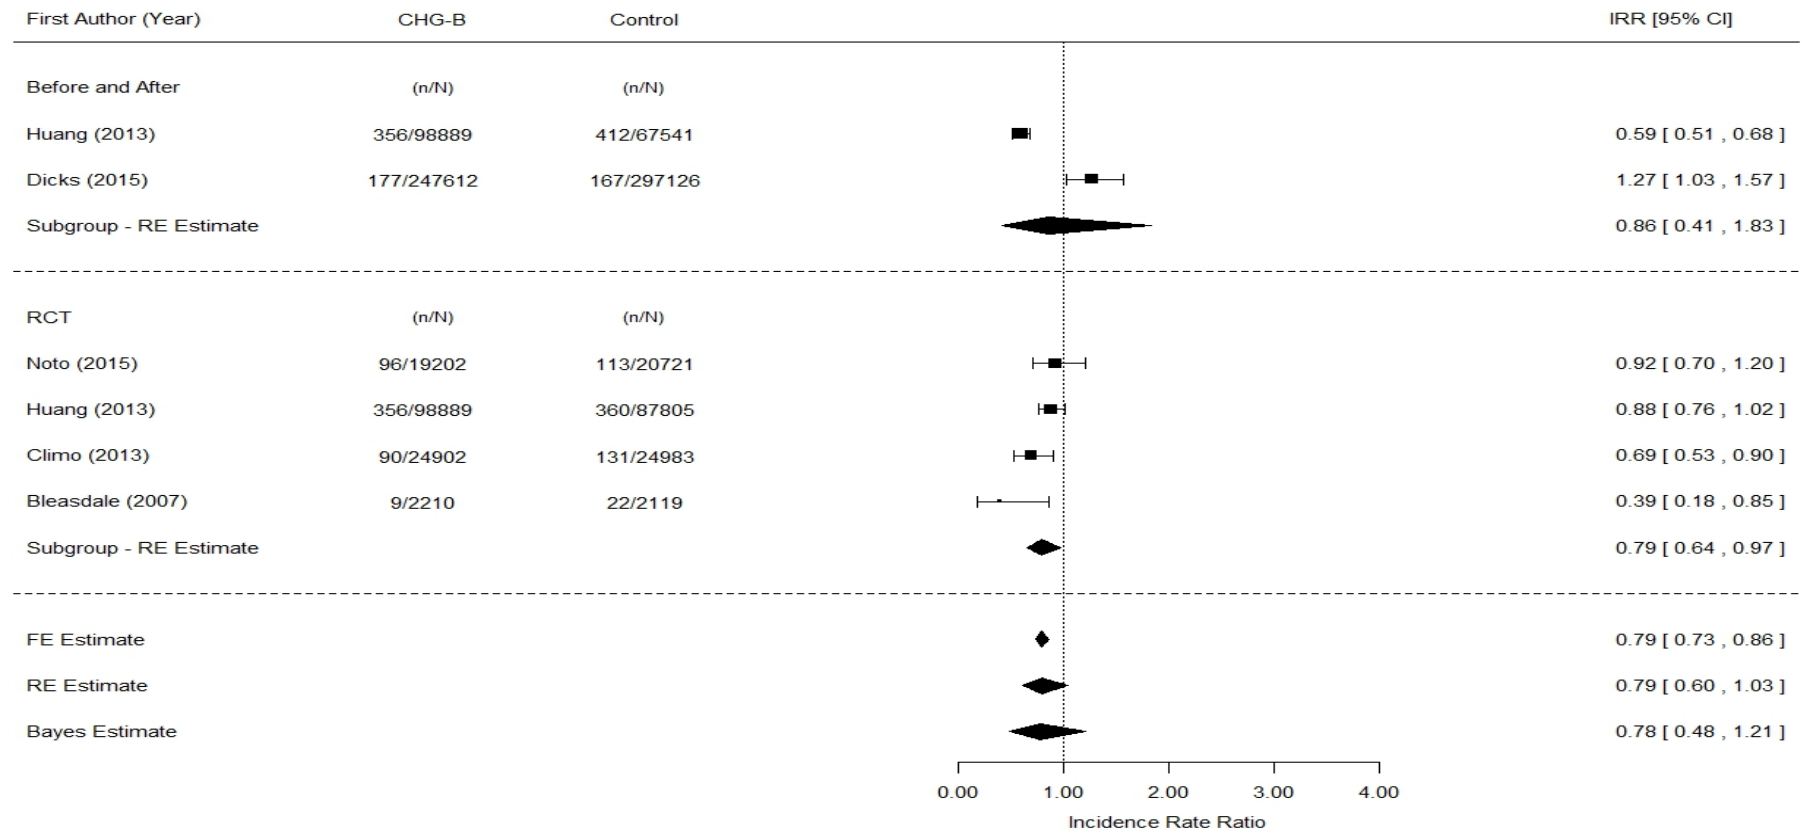

**Figure 2.** Forest plots presenting the effectiveness of CHG bathing in reducing: BSI (panel A), CLABSI (panel B), VAP (panel C), CAUTI (panel D), MRSA colonisation (panel E), MRSA associated BSI (panel F), VRE colonisation (panel G), VRE associated BSI (panel H), and Clostridium Difficile infections (panel I). FE = fixed effects, RE = random effects.

(b) CLABSI

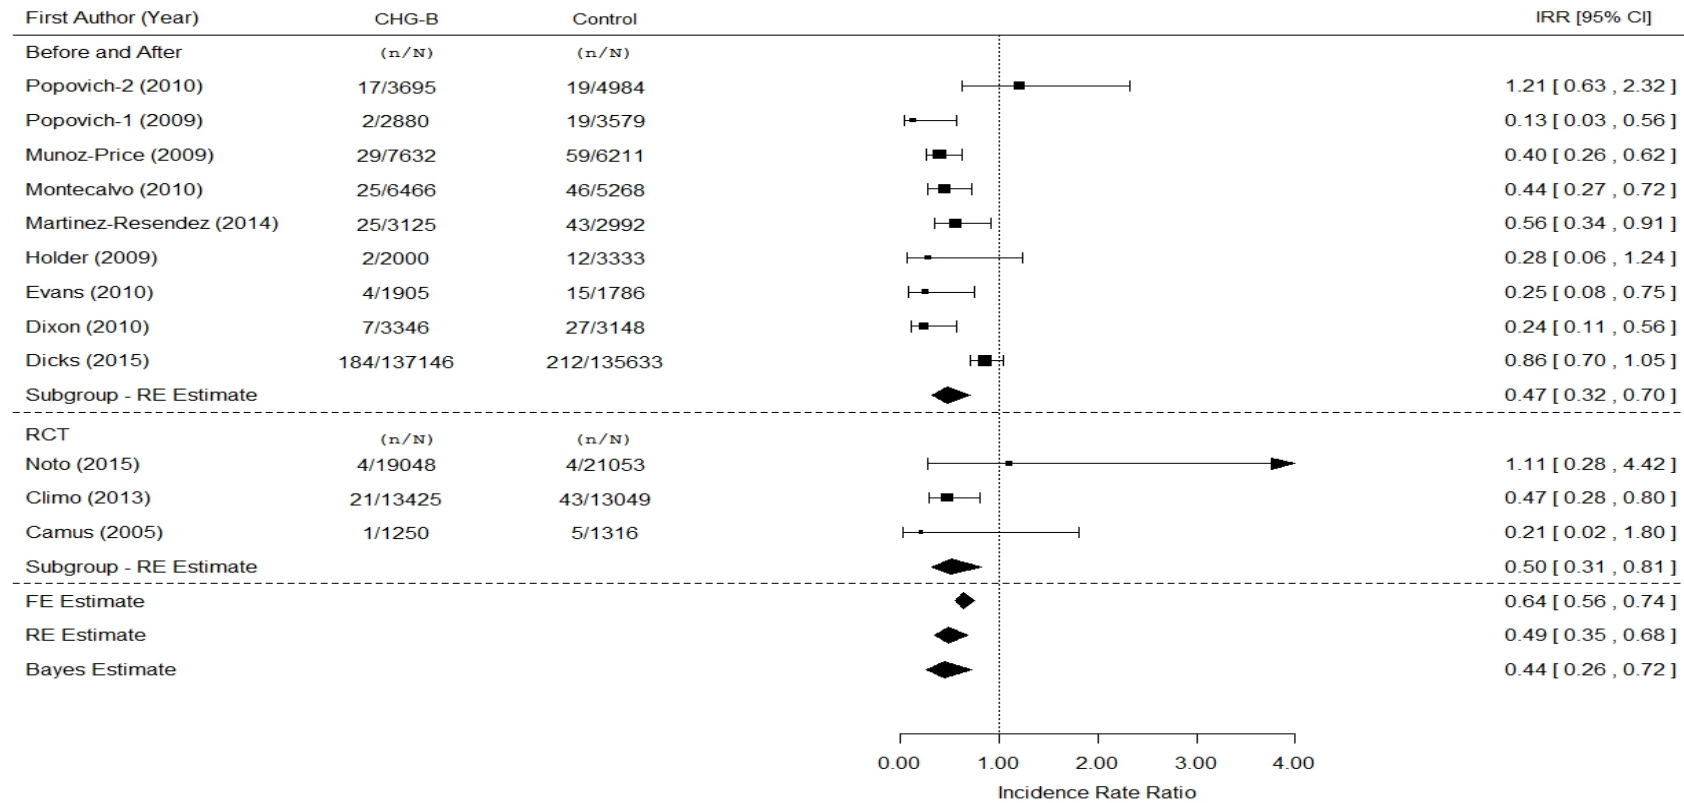

**Figure 2.** Forest plots presenting the effectiveness of CHG bathing in reducing: BSI (panel A), CLABSI (panel B), VAP (panel C), CAUTI (panel D), MRSA colonisation (panel E), MRSA associated BSI (panel F), VRE colonisation (panel G), VRE associated BSI (panel H), and Clostridium Difficile infections (panel I). FE = fixed effects, RE = random effects.

(c) VAP

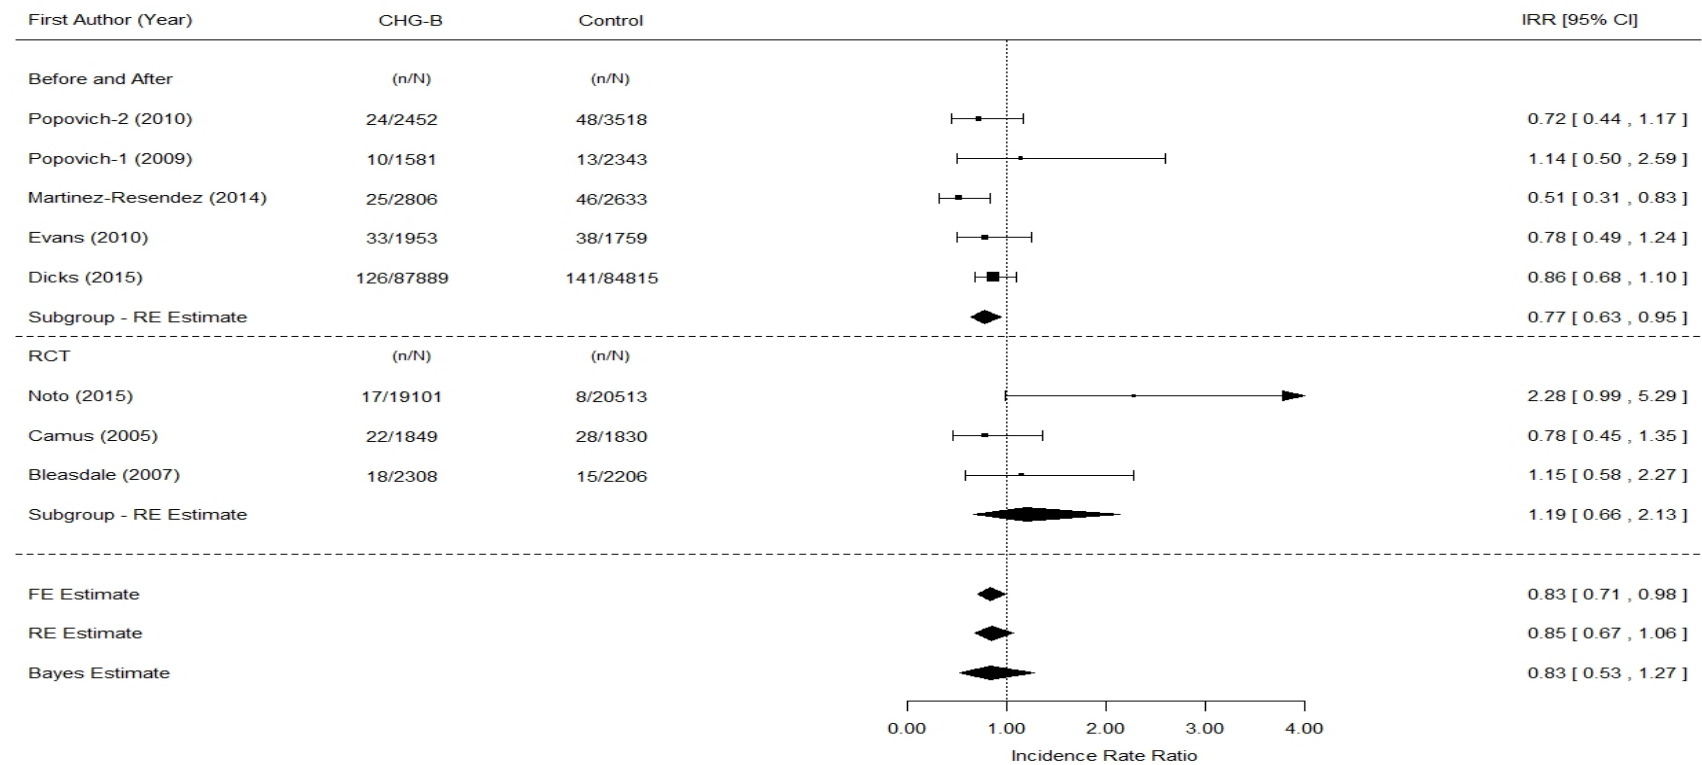

**Figure 2.** Forest plots presenting the effectiveness of CHG bathing in reducing: BSI (panel A), CLABSI (panel B), VAP (panel C), CAUTI (panel D), MRSA colonisation (panel E), MRSA associated BSI (panel F), VRE colonisation (panel G), VRE associated BSI (panel H), and Clostridium Difficile infections (panel I). FE = fixed effects, RE = random effects.

(d) CAUTI

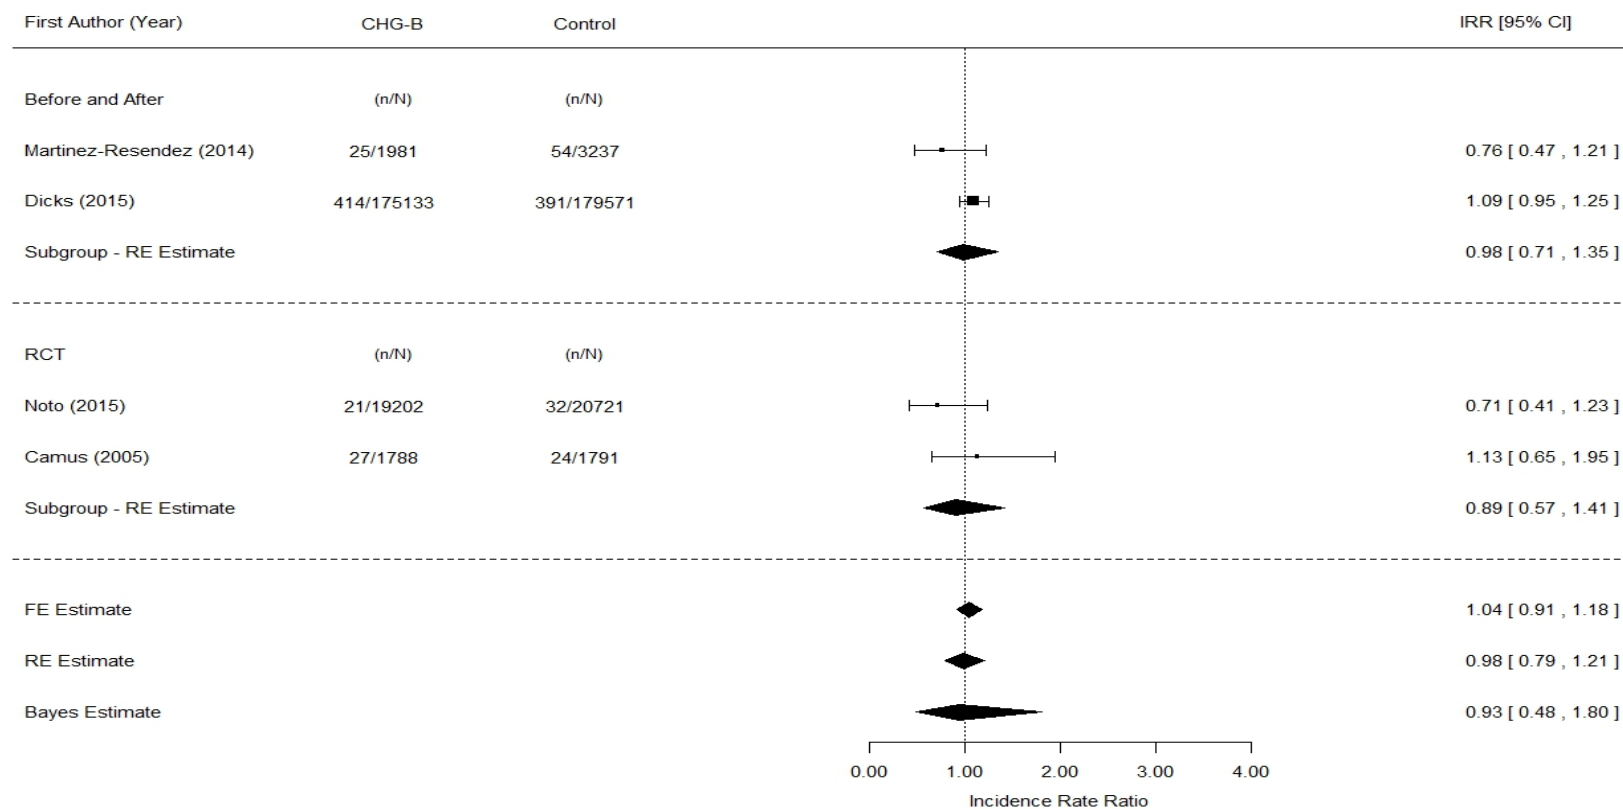

**Figure 2.** Forest plots presenting the effectiveness of CHG bathing in reducing: BSI (panel A), CLABSI (panel B), VAP (panel C), CAUTI (panel D), MRSA colonisation (panel E), MRSA associated BSI (panel F), VRE colonisation (panel G), VRE associated BSI (panel H), and Clostridium Difficile infections (panel I). FE = fixed effects, RE = random effects.

(e) MRSA-C

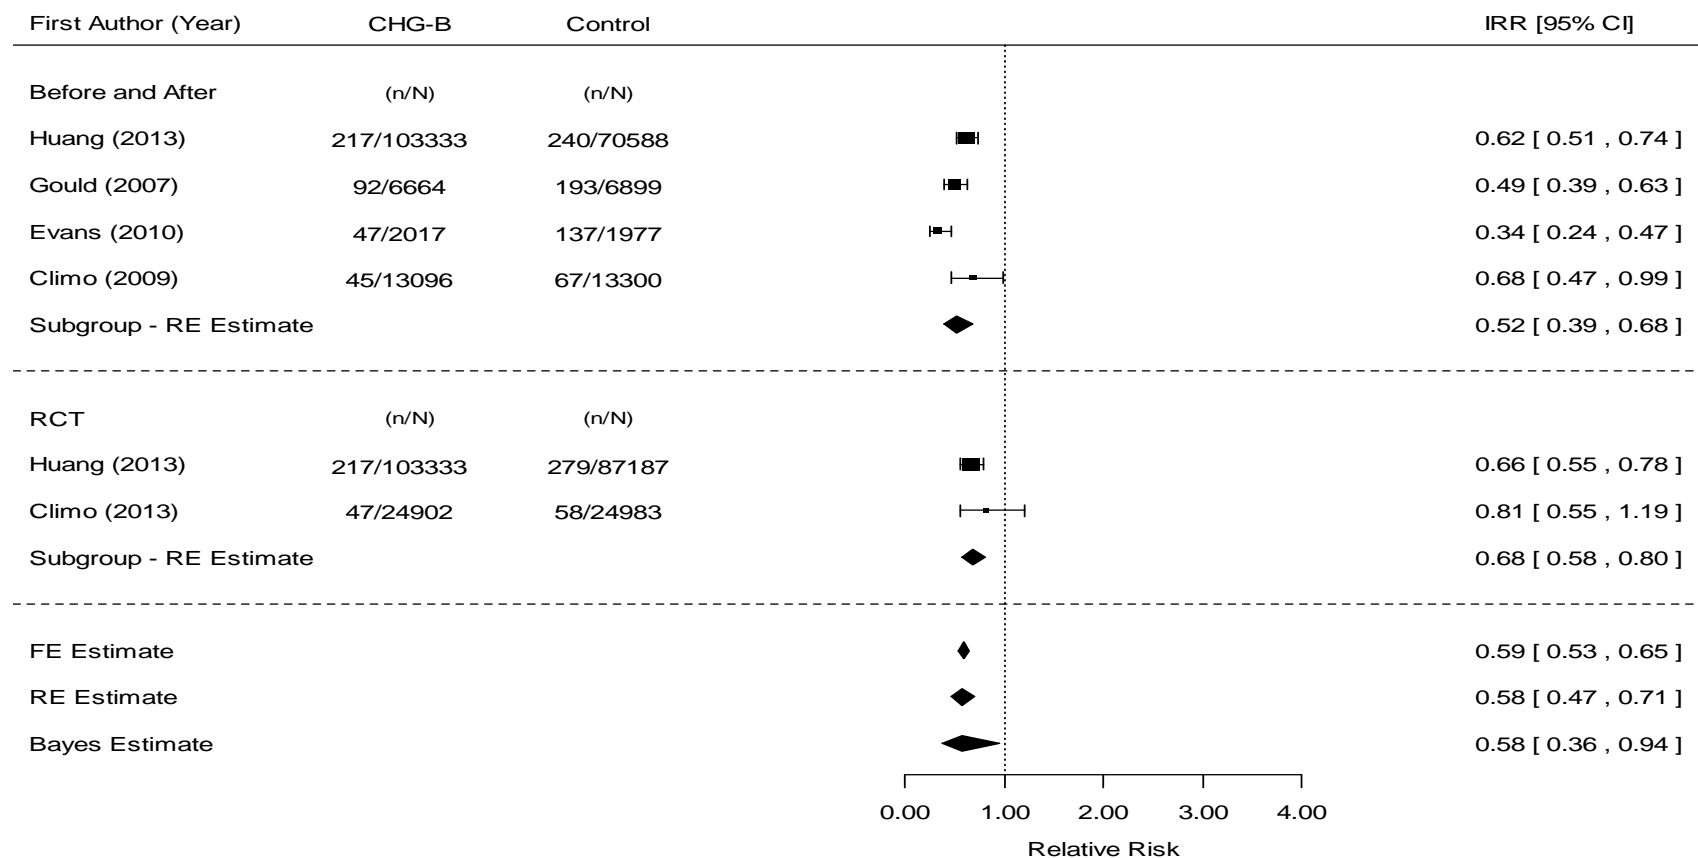

**Figure 2.** Forest plots presenting the effectiveness of CHG bathing in reducing: BSI (panel A), CLABSI (panel B), VAP (panel C), CAUTI (panel D), MRSA colonisation (panel E), MRSA associated BSI (panel F), VRE colonisation (panel G), VRE associated BSI (panel H), and Clostridium Difficile infections (panel I). FE = fixed effects, RE = random effects.

(f) MRSA-B

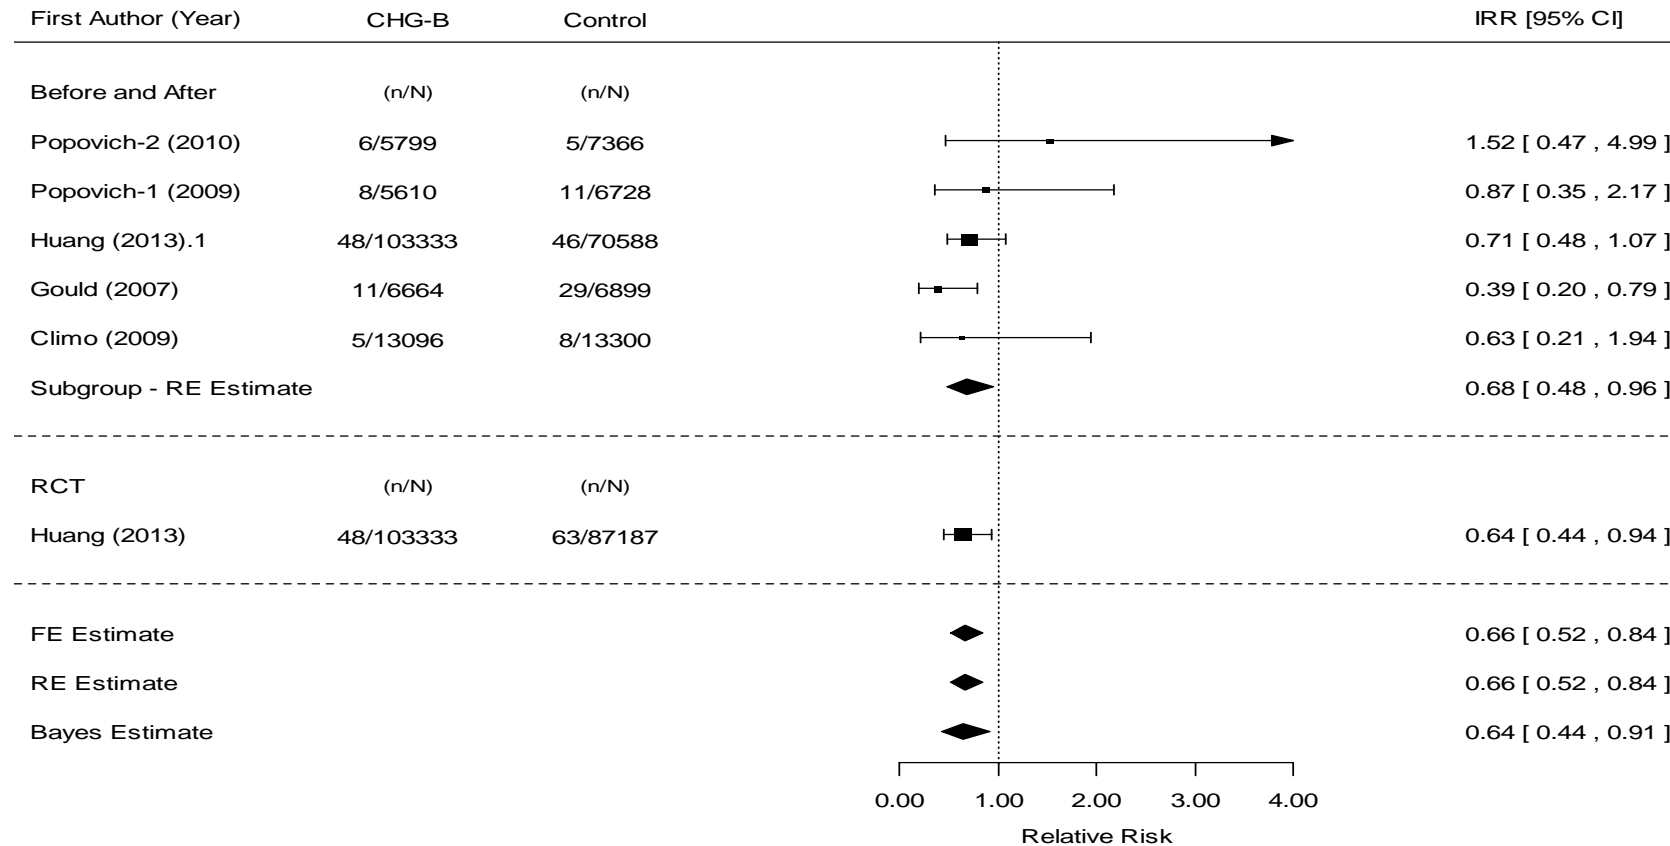

**Figure 2.** Forest plots presenting the effectiveness of CHG bathing in reducing: BSI (panel A), CLABSI (panel B), VAP (panel C), CAUTI (panel D), MRSA colonisation (panel E), MRSA associated BSI (panel F), VRE colonisation (panel G), VRE associated BSI (panel H), and Clostridium Difficile infections (panel I). FE = fixed effects, RE = random effects.

(g) VRE-C

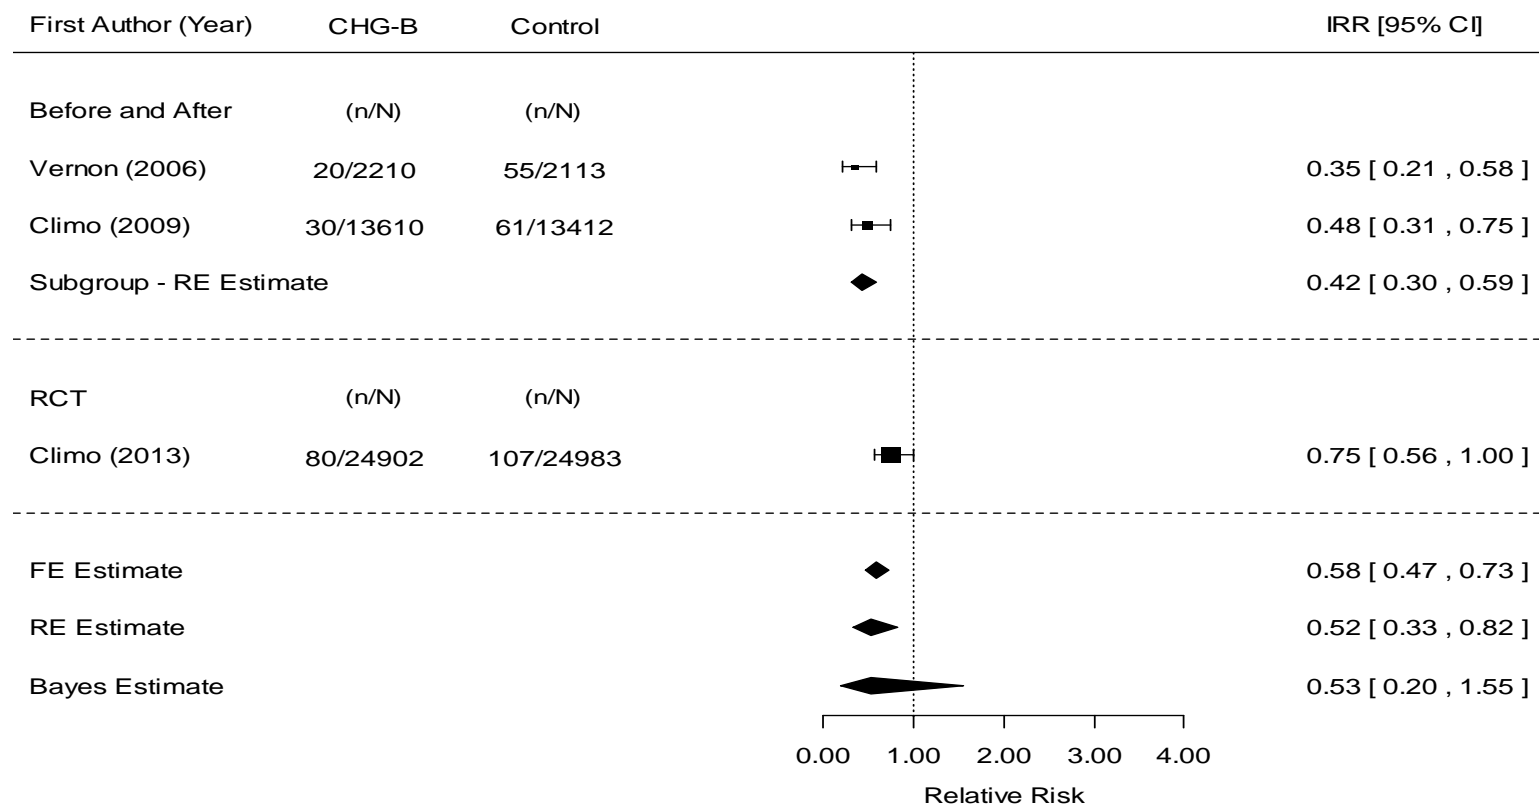

**Figure 2.** Forest plots presenting the effectiveness of CHG bathing in reducing: BSI (panel A), CLABSI (panel B), VAP (panel C), CAUTI (panel D), MRSA colonisation (panel E), MRSA associated BSI (panel F), VRE colonisation (panel G), VRE associated BSI (panel H), and Clostridium Difficile infections (panel I). FE = fixed effects, RE = random effects.

(h) VRE-B

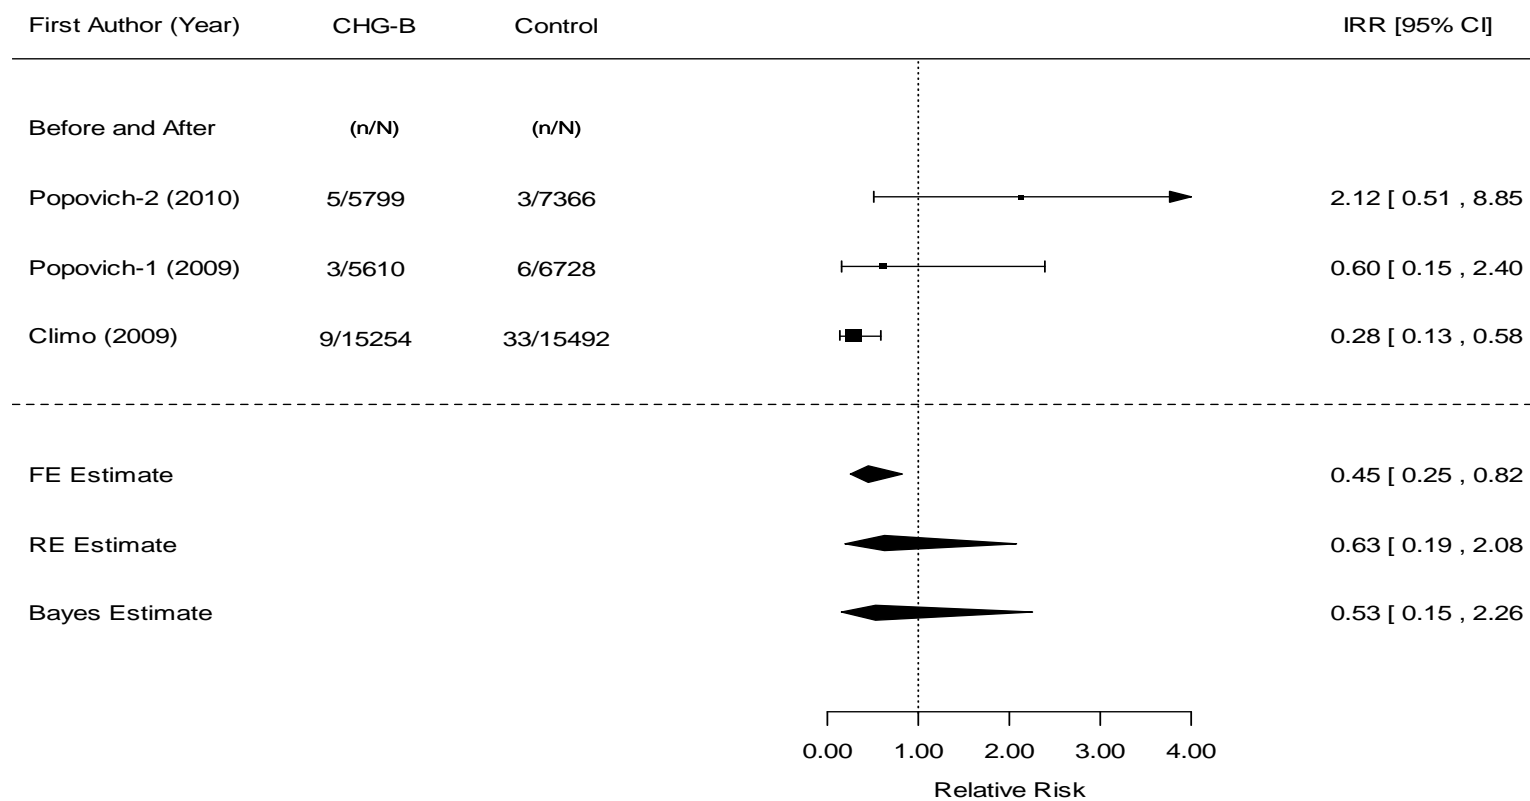

**Figure 2.** Forest plots presenting the effectiveness of CHG bathing in reducing: BSI (panel A), CLABSI (panel B), VAP (panel C), CAUTI (panel D), MRSA colonisation (panel E), MRSA associated BSI (panel F), VRE colonisation (panel G), VRE associated BSI (panel H), and Clostridium Difficile infections (panel I). FE = fixed effects, RE = random effects.



(i) c-diff

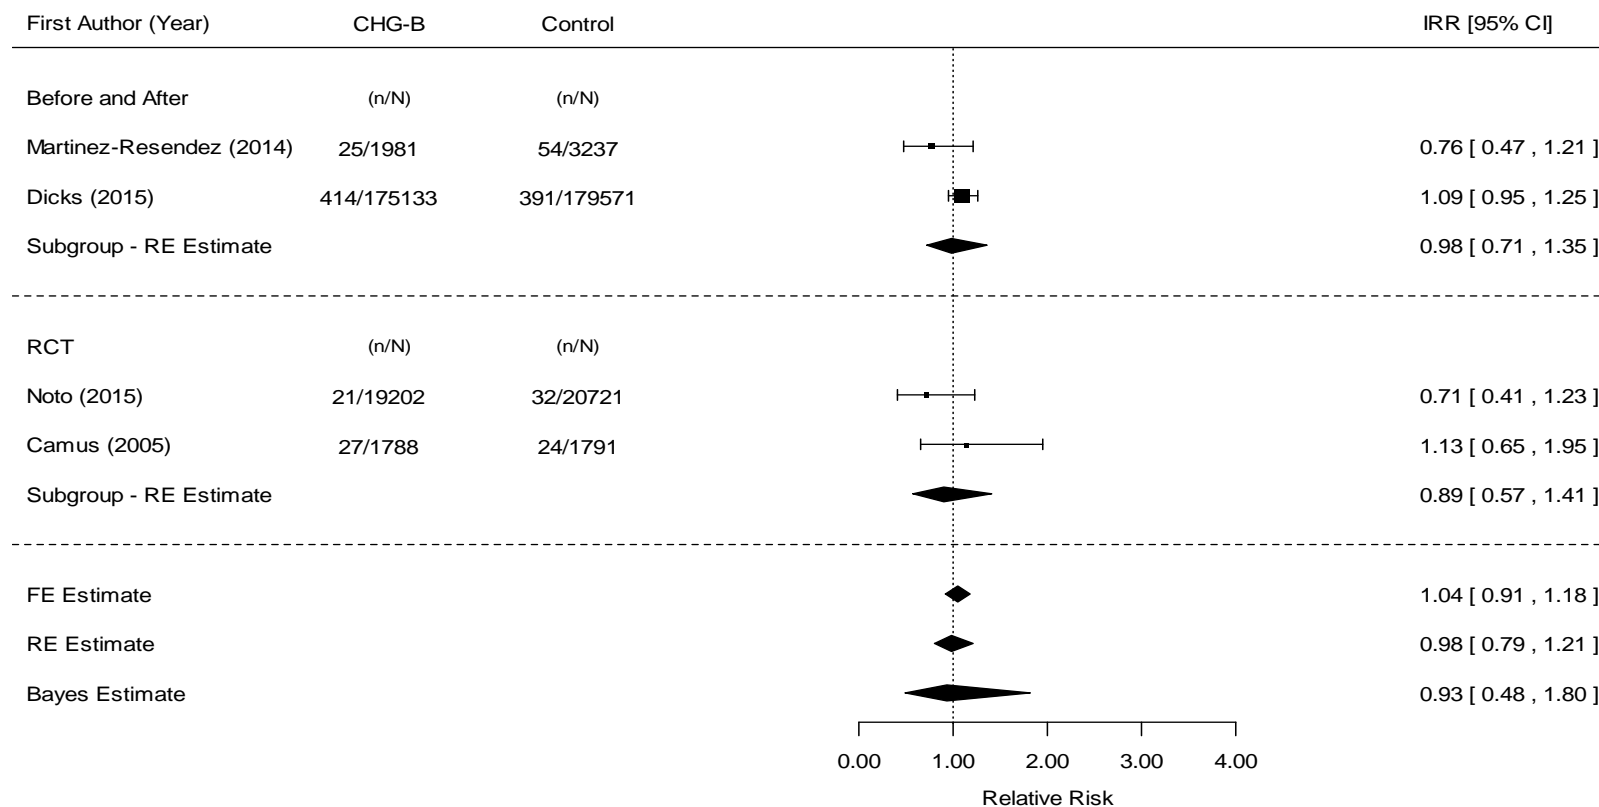

**Figure 2.** Forest plots presenting the effectiveness of CHG bathing in reducing: BSI (panel A), CLABSI (panel B), VAP (panel C), CAUTI (panel D), MRSA colonisation (panel E), MRSA associated BSI (panel F), VRE colonisation (panel G), VRE associated BSI (panel H), and Clostridium Difficile infections (panel I). FE = fixed effects, RE = random effects.
